# Supplementary material for: Arsenic Exposure and Predicted 10-Year Atherosclerotic Cardiovascular Risk Using the Pooled Cohort Equations in U.S. Hypertensive Adults
Source: MDPI journal article supplement (doi:10.3390/ijerph13111093), 2016-11-07

# Supplementary Materials: Arsenic Exposure and Predicted 10-Year Atherosclerotic Cardiovascular Risk Using the Pooled Cohort Equations in U.S. Hypertensive Adults

Qingjiao Nong, Yiyi Zhang, Eliseo Guallar and Qian Zhong

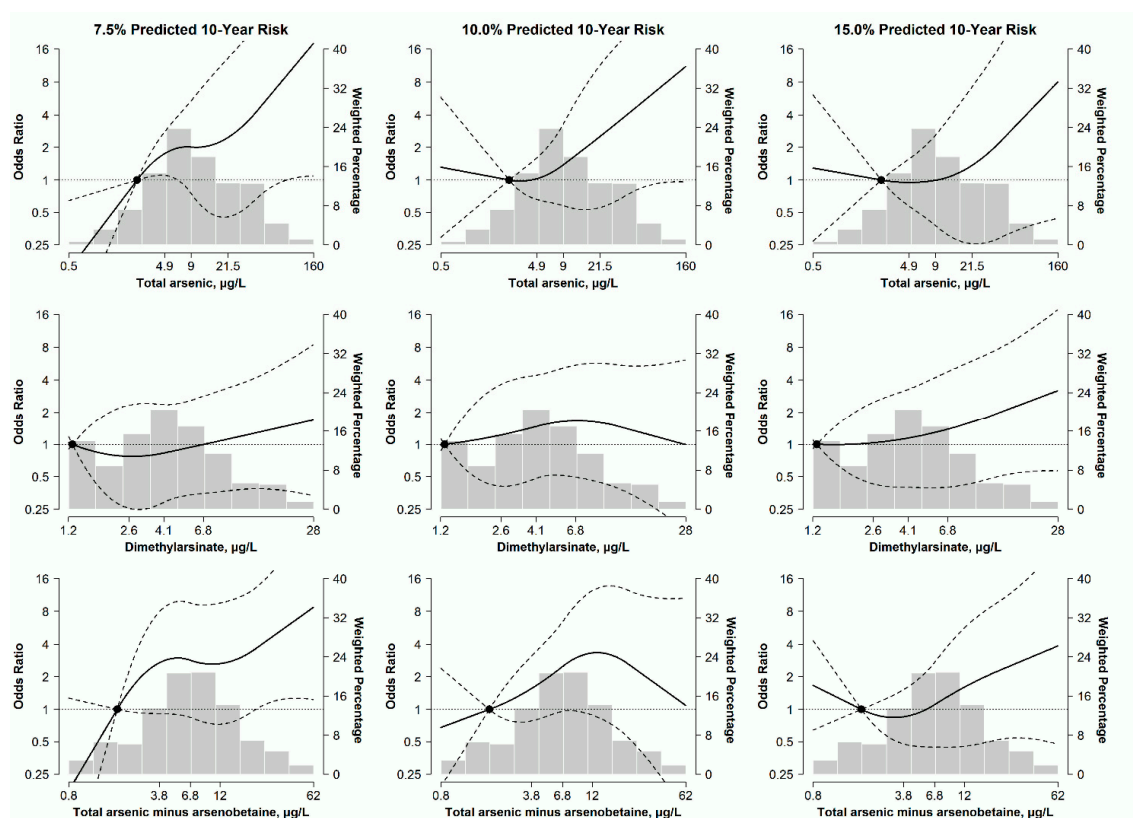

**Figure S1.** Odds ratio (95% confidence interval (CI)) of high predicted 10-year atherosclerotic cardiovascular disease (ASCVD) risk by urine arsenic concentrations in hypertensive men ( $n = 739$ ). Odds ratios (solid lines) and 95% CIs (curved dashed lines) were based on restricted quadratic splines for log-transformed urine arsenic concentrations with knots at the 10th, 50th and 90th percentiles. The reference value (circle) was set at the 10th of each arsenical distribution. Odds ratios (95% CIs) were adjusted for age (years), race (non-Hispanic white, non-Hispanic black, other), urine creatinine (log g/L), education (<high school, ≥high school), body mass index (kg/m<sup>2</sup>), serum cotinine (log ng/mL), diabetes (yes, no), total cholesterol (mg/dL), high-density lipoprotein cholesterol (mg/dL), arsenobetaine (log µg/L) and seafood (yes, no). Bars represent the weighted histogram of the urine arsenic distribution.

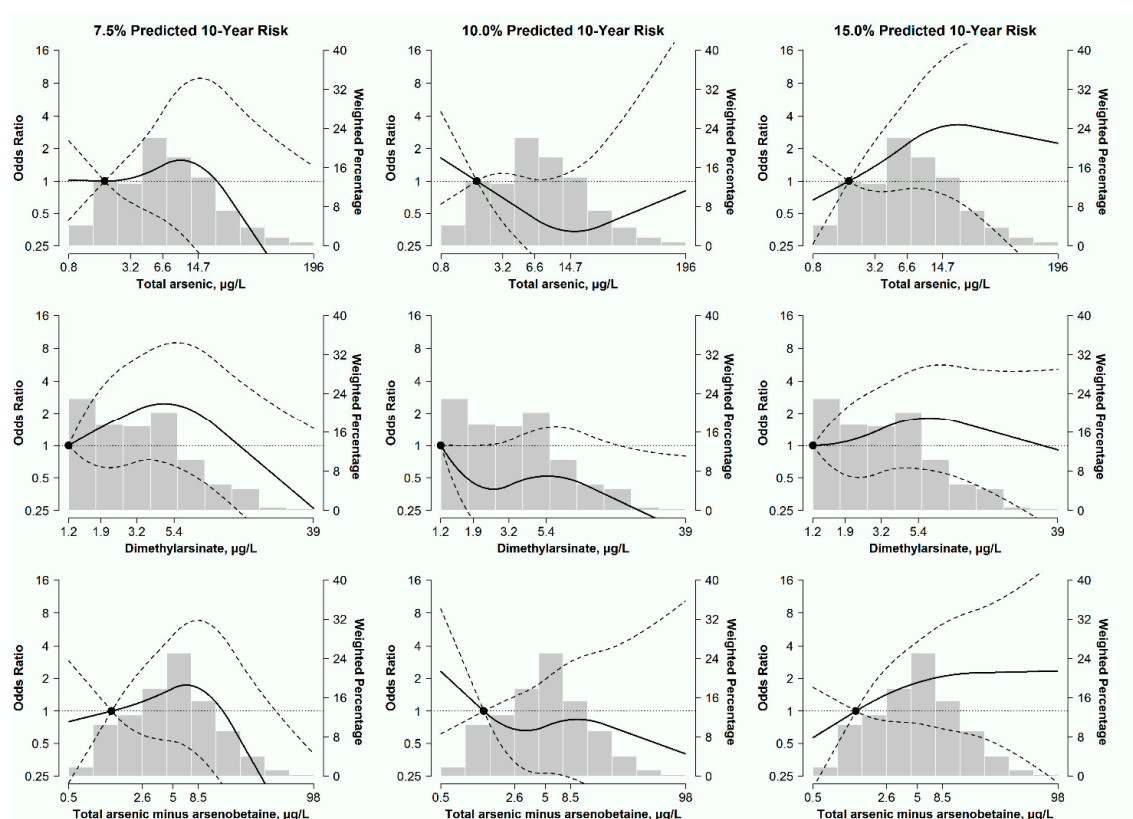

**Figure S2.** Odds ratio (95% CI) of high predicted 10-year ASCVD risk by urine arsenic concentrations in hypertensive women ( $n = 831$ ). Odds ratios (solid lines) and 95% CIs (curved dashed lines) were based on restricted quadratic splines for log-transformed urine arsenic concentrations with knots at the 10th, 50th and 90th percentiles. The reference value (circle) was set at the 10th of each arsenical distribution. Odds ratios (95% CIs) were adjusted for age (years), race (non-Hispanic white, non-Hispanic black, other), urine creatinine (log g/L), education (<high school,  $\geq$ high school), body mass index ( $\text{kg}/\text{m}^2$ ), serum cotinine (log ng/mL), diabetes (yes, no), total cholesterol (mg/dL), high-density lipoprotein cholesterol (mg/dL), arsenobetaine (log  $\mu\text{g}/\text{L}$ ) and seafood (yes, no). Bars represent the weighted histogram of the urine arsenic distribution.

**Table S1.** Ratio (95% confidence interval (CI)) of predicted 10-year atherosclerotic cardiovascular disease (ASCVD) risk by quartiles of urine arsenic concentrations in hypertensive participants ( $n = 1570$ ).

|                                                       | Quartile 1    | Quartile 2       | Quartile 3       | Quartile 4       | <i>p</i> for Trend |
|-------------------------------------------------------|---------------|------------------|------------------|------------------|--------------------|
| Men ( $n = 739$ )                                     |               |                  |                  |                  |                    |
| Total arsenic ( $\mu\text{g/L}$ )                     | $\leq 4.92$   | 4.93–9.20        | 9.21–21.56       | $\geq 21.57$     |                    |
| Model 1                                               | 1 (reference) | 1.02 (0.80–1.30) | 0.88 (0.73–1.07) | 0.98 (0.76–1.25) | 0.92               |
| Model 2                                               | 1 (reference) | 0.97 (0.85–1.11) | 0.97 (0.86–1.09) | 1.05 (0.92–1.19) | 0.10               |
| Model 3                                               | 1 (reference) | 1.00 (0.88–1.13) | 1.05 (0.92–1.21) | 1.23 (1.01–1.50) | 0.008              |
| Dimethylarsinate ( $\mu\text{g/L}$ )                  | $\leq 2.61$   | 2.62–4.10        | 4.11–6.86        | $\geq 6.87$      |                    |
| Model 1                                               | 1 (reference) | 0.99 (0.82–1.19) | 0.94 (0.80–1.12) | 0.95 (0.77–1.18) | 0.64               |
| Model 2                                               | 1 (reference) | 0.97 (0.89–1.06) | 0.98 (0.89–1.09) | 1.07 (0.98–1.17) | 0.03               |
| Model 3                                               | 1 (reference) | 0.98 (0.90–1.07) | 1.00 (0.90–1.11) | 1.11 (1.01–1.22) | 0.004              |
| Total arsenic minus arsenobetaine ( $\mu\text{g/L}$ ) | $\leq 3.83$   | 3.84–6.66        | 6.67–11.51       | $\geq 11.52$     |                    |
| Model 1                                               | 1 (reference) | 1.03 (0.84–1.27) | 1.03 (0.83–1.29) | 1.00 (0.78–1.27) | 0.82               |
| Model 2                                               | 1 (reference) | 1.09 (0.98–1.20) | 1.06 (0.95–1.20) | 1.14 (1.01–1.29) | 0.04               |
| Model 3                                               | 1 (reference) | 1.09 (0.98–1.21) | 1.09 (0.97–1.22) | 1.20 (1.04–1.38) | 0.01               |
| Women ( $n = 831$ )                                   |               |                  |                  |                  |                    |
| Total arsenic ( $\mu\text{g/L}$ )                     | $\leq 3.30$   | 3.31–6.71        | 6.72–14.92       | $\geq 14.93$     |                    |
| Model 1                                               | 1 (reference) | 0.97 (0.81–1.16) | 0.85 (0.70–1.04) | 0.92 (0.73–1.16) | 0.67               |
| Model 2                                               | 1 (reference) | 1.01 (0.90–1.14) | 1.10 (0.98–1.24) | 1.12 (0.97–1.29) | 0.11               |
| Model 3                                               | 1 (reference) | 1.00 (0.88–1.13) | 1.06 (0.91–1.24) | 1.04 (0.84–1.29) | 0.84               |
| Dimethylarsinate ( $\mu\text{g/L}$ )                  | $\leq 1.89$   | 1.90–3.15        | 3.16–5.36        | $\geq 5.37$      |                    |
| Model 1                                               | 1 (reference) | 1.00 (0.80–1.23) | 1.07 (0.84–1.38) | 0.94 (0.71–1.23) | 0.45               |
| Model 2                                               | 1 (reference) | 1.13 (1.00–1.27) | 1.14 (0.98–1.32) | 1.14 (0.97–1.33) | 0.39               |
| Model 3                                               | 1 (reference) | 1.11 (0.98–1.25) | 1.11 (0.96–1.28) | 1.08 (0.91–1.28) | 0.95               |
| Total arsenic minus arsenobetaine ( $\mu\text{g/L}$ ) | $\leq 2.40$   | 2.41–4.82        | 4.83–8.33        | $\geq 8.34$      |                    |
| Model 1                                               | 1 (reference) | 0.96 (0.80–1.16) | 0.93 (0.72–1.21) | 0.89 (0.70–1.14) | 0.34               |
| Model 2                                               | 1 (reference) | 1.03 (0.92–1.16) | 1.15 (0.98–1.34) | 1.08 (0.94–1.25) | 0.38               |
| Model 3                                               | 1 (reference) | 1.00 (0.88–1.14) | 1.10 (0.93–1.30) | 0.99 (0.83–1.18) | 0.54               |

Model 1: adjusted for age (years), race (non-Hispanic white, non-Hispanic black, other) and urine creatinine (log g/L); Model 2: further adjusted for education (<high school,  $\geq$ high school), body mass index (kg/m<sup>2</sup>), serum cotinine (log ng/mL), diabetes (yes, no), total cholesterol (mg/dL) and high-density lipoprotein cholesterol (mg/dL); Model 3: further adjusted for arsenobetaine (log  $\mu\text{g/L}$ ).

**Table S2.** Ratio (95% CI) of predicted 10-year ASCVD risk by quartiles of urine arsenic concentrations in non-hypertensive participants ( $n = 1979$ ).

|                                                       | Quartile 1    | Quartile 2       | Quartile 3       | Quartile 4       | <i>p</i> for Trend |
|-------------------------------------------------------|---------------|------------------|------------------|------------------|--------------------|
| <b>Men (<math>n = 990</math>)</b>                     |               |                  |                  |                  |                    |
| Total arsenic ( $\mu\text{g/L}$ )                     | $\leq 4.75$   | 4.76–8.75        | 8.76–18.67       | $\geq 18.68$     |                    |
| Model 1                                               | 1 (reference) | 0.92 (0.80–1.06) | 0.86 (0.74–0.99) | 0.84 (0.74–0.96) | 0.08               |
| Model 2                                               | 1 (reference) | 1.04 (0.96–1.12) | 1.04 (0.95–1.14) | 1.01 (0.90–1.12) | 0.69               |
| Model 3                                               | 1 (reference) | 1.03 (0.95–1.12) | 1.02 (0.93–1.13) | 0.97 (0.85–1.11) | 0.28               |
| Dimethylarsinate ( $\mu\text{g/L}$ )                  | $\leq 2.32$   | 2.33–3.95        | 3.96–6.14        | $\geq 6.15$      |                    |
| Model 1                                               | 1 (reference) | 0.89 (0.76–1.04) | 0.84 (0.72–0.97) | 0.85 (0.72–1.01) | 0.18               |
| Model 2                                               | 1 (reference) | 1.01 (0.92–1.12) | 0.99 (0.90–1.10) | 0.99 (0.89–1.10) | 0.74               |
| Model 3                                               | 1 (reference) | 1.01 (0.91–1.12) | 0.99 (0.89–1.10) | 0.98 (0.88–1.10) | 0.64               |
| Total arsenic minus arsenobetaine ( $\mu\text{g/L}$ ) | $\leq 3.41$   | 3.42–6.06        | 6.07–11.12       | $\geq 11.13$     |                    |
| Model 1                                               | 1 (reference) | 0.80 (0.70–0.92) | 0.80 (0.69–0.92) | 0.81 (0.69–0.95) | 0.28               |
| Model 2                                               | 1 (reference) | 0.98 (0.90–1.06) | 0.97 (0.88–1.07) | 0.96 (0.86–1.07) | 0.55               |
| Model 3                                               | 1 (reference) | 0.98 (0.90–1.06) | 0.97 (0.88–1.06) | 0.94 (0.84–1.05) | 0.34               |
| <b>Women (<math>n = 989</math>)</b>                   |               |                  |                  |                  |                    |
| Total arsenic ( $\mu\text{g/L}$ )                     | $\leq 3.32$   | 3.33–7.14        | 7.15–14.57       | $\geq 14.58$     |                    |
| Model 1                                               | 1 (reference) | 0.86 (0.72–1.04) | 0.73 (0.62–0.87) | 0.67 (0.56–0.80) | <0.001             |
| Model 2                                               | 1 (reference) | 1.04 (0.96–1.12) | 0.99 (0.92–1.07) | 0.97 (0.90–1.05) | 0.19               |
| Model 3                                               | 1 (reference) | 1.02 (0.94–1.11) | 0.96 (0.88–1.05) | 0.92 (0.80–1.05) | 0.11               |
| Dimethylarsinate ( $\mu\text{g/L}$ )                  | $\leq 1.81$   | 1.82–3.03        | 3.04–5.66        | $\geq 5.67$      |                    |
| Model 1                                               | 1 (reference) | 0.74 (0.64–0.85) | 0.69 (0.57–0.84) | 0.61 (0.51–0.72) | <0.001             |
| Model 2                                               | 1 (reference) | 0.99 (0.91–1.07) | 1.01 (0.92–1.11) | 0.95 (0.86–1.04) | 0.14               |
| Model 3                                               | 1 (reference) | 0.98 (0.90–1.07) | 1.01 (0.91–1.11) | 0.94 (0.84–1.04) | 0.10               |
| Total arsenic minus arsenobetaine ( $\mu\text{g/L}$ ) | $\leq 2.33$   | 2.34–4.79        | 4.80–8.95        | $\geq 8.96$      |                    |
| Model 1                                               | 1 (reference) | 0.75 (0.64–0.87) | 0.71 (0.59–0.85) | 0.64 (0.53–0.78) | <0.001             |
| Model 2                                               | 1 (reference) | 0.99 (0.92–1.07) | 0.99 (0.91–1.08) | 0.96 (0.88–1.04) | 0.24               |
| Model 3                                               | 1 (reference) | 0.99 (0.92–1.07) | 0.98 (0.90–1.08) | 0.95 (0.86–1.04) | 0.23               |

Model 1: adjusted for age (years), race (non-Hispanic white, non-Hispanic black, other) and urine creatinine (log g/L); Model 2: further adjusted for education (<high school,  $\geq$ high school), body mass index (kg/m<sup>2</sup>), serum cotinine (log ng/mL), diabetes (yes, no), total cholesterol (mg/dL), and high-density lipoprotein cholesterol (mg/dL); Model 3: further adjusted for arsenobetaine (log  $\mu\text{g/L}$ ) and seafood (yes, no).

**Table S3.** Ratio (95% CI) of predicted 10-year ASCVD risk by quartiles of urine arsenic concentrations in overall participants ( $n = 3549$ ).

|                                                       | Quartile 1    | Quartile 2       | Quartile 3       | Quartile 4       | <i>p</i> for Trend |
|-------------------------------------------------------|---------------|------------------|------------------|------------------|--------------------|
| <b>Men (<math>n = 1729</math>)</b>                    |               |                  |                  |                  |                    |
| Total arsenic ( $\mu\text{g/L}$ )                     | $\leq 4.78$   | 4.79–8.96        | 8.97–19.42       | $\geq 19.43$     |                    |
| Model 1                                               | 1 (reference) | 0.95 (0.83–1.09) | 0.88 (0.78–0.99) | 0.89 (0.78–1.03) | 0.22               |
| Model 2                                               | 1 (reference) | 1.02 (0.94–1.10) | 1.04 (0.95–1.13) | 1.03 (0.93–1.14) | 0.69               |
| Model 3                                               | 1 (reference) | 1.02 (0.95–1.11) | 1.05 (0.96–1.15) | 1.07 (0.95–1.20) | 0.43               |
| Dimethylarsinate ( $\mu\text{g/L}$ )                  | $\leq 2.40$   | 2.41–4.00        | 4.01–6.42        | $\geq 6.43$      |                    |
| Model 1                                               | 1 (reference) | 0.90 (0.79–1.03) | 0.87 (0.76–1.00) | 0.88 (0.75–1.03) | 0.27               |
| Model 2                                               | 1 (reference) | 1.01 (0.94–1.09) | 1.02 (0.94–1.12) | 1.05 (0.96–1.14) | 0.26               |
| Model 3                                               | 1 (reference) | 1.01 (0.94–1.09) | 1.03 (0.94–1.12) | 1.06 (0.97–1.15) | 0.15               |
| Total arsenic minus arsenobetaine ( $\mu\text{g/L}$ ) | $\leq 3.55$   | 3.56–6.38        | 6.39–11.34       | $\geq 11.35$     |                    |
| Model 1                                               | 1 (reference) | 0.89 (0.77–1.03) | 0.91 (0.78–1.06) | 0.89 (0.75–1.05) | 0.42               |
| Model 2                                               | 1 (reference) | 1.04 (0.97–1.13) | 1.04 (0.95–1.14) | 1.06 (0.96–1.17) | 0.36               |
| Model 3                                               | 1 (reference) | 1.05 (0.97–1.13) | 1.04 (0.95–1.15) | 1.08 (0.98–1.19) | 0.22               |
| <b>Women (<math>n = 1820</math>)</b>                  |               |                  |                  |                  |                    |
| Total arsenic ( $\mu\text{g/L}$ )                     | $\leq 3.31$   | 3.32–6.90        | 6.91–14.74       | $\geq 14.75$     |                    |
| Model 1                                               | 1 (reference) | 0.87 (0.74–1.01) | 0.73 (0.63–0.86) | 0.74 (0.62–0.88) | 0.003              |
| Model 2                                               | 1 (reference) | 1.00 (0.92–1.09) | 1.03 (0.94–1.13) | 1.04 (0.94–1.15) | 0.37               |
| Model 3                                               | 1 (reference) | 1.00 (0.91–1.08) | 1.02 (0.92–1.13) | 1.01 (0.88–1.17) | 0.93               |
| Dimethylarsinate ( $\mu\text{g/L}$ )                  | $\leq 1.84$   | 1.85–3.11        | 3.12–5.50        | $\geq 5.51$      |                    |
| Model 1                                               | 1 (reference) | 0.83 (0.73–0.94) | 0.85 (0.70–1.02) | 0.71 (0.60–0.84) | <0.001             |
| Model 2                                               | 1 (reference) | 1.06 (0.98–1.15) | 1.10 (1.00–1.21) | 1.04 (0.94–1.15) | 0.98               |
| Model 3                                               | 1 (reference) | 1.06 (0.98–1.14) | 1.08 (0.99–1.19) | 1.03 (0.93–1.14) | 0.63               |
| Total arsenic minus arsenobetaine ( $\mu\text{g/L}$ ) | $\leq 2.37$   | 2.38–4.81        | 4.82–8.65        | $\geq 8.66$      |                    |
| Model 1                                               | 1 (reference) | 0.81 (0.70–0.94) | 0.80 (0.66–0.97) | 0.70 (0.59–0.84) | <0.001             |
| Model 2                                               | 1 (reference) | 1.00 (0.93–1.08) | 1.08 (0.98–1.19) | 1.03 (0.94–1.12) | 0.70               |
| Model 3                                               | 1 (reference) | 1.00 (0.92–1.08) | 1.06 (0.96–1.18) | 1.00 (0.90–1.10) | 0.67               |

Model 1: adjusted for age (years), race (non-Hispanic white, non-Hispanic black, other) and urine creatinine (log g/L; Model 2: further adjusted for education (<high school,  $\geq$ high school), body mass index (kg/m<sup>2</sup>), serum cotinine (log ng/mL), diabetes (yes, no), total cholesterol (mg/dL) and high-density lipoprotein cholesterol (mg/dL); Model 3: further adjusted for arsenobetaine (log  $\mu\text{g/L}$ ) and seafood (yes, no).

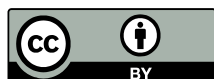

Supplement: s1 [file s1]
